# Supplementary material
Source: PubMed Central journal article supplement (PMC1283791)

**A**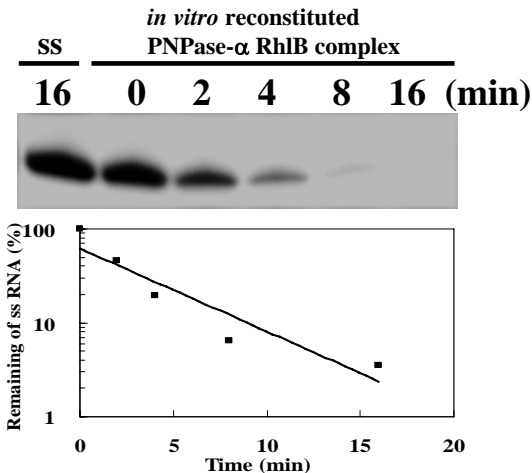**B**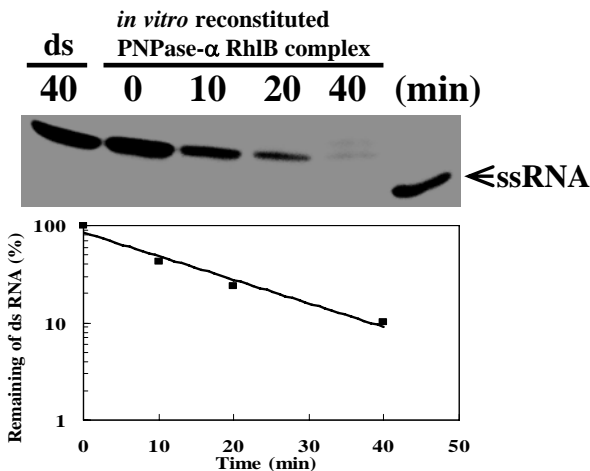

Supplement: pnas_0500994102_1.pdf [file pnas_0500994102_1.pdf]

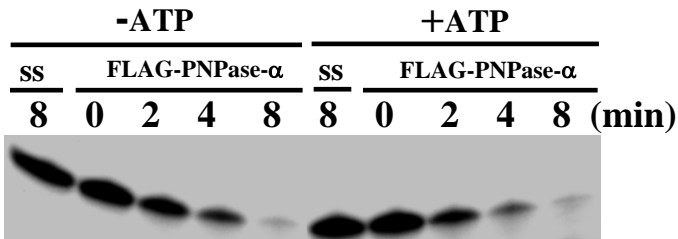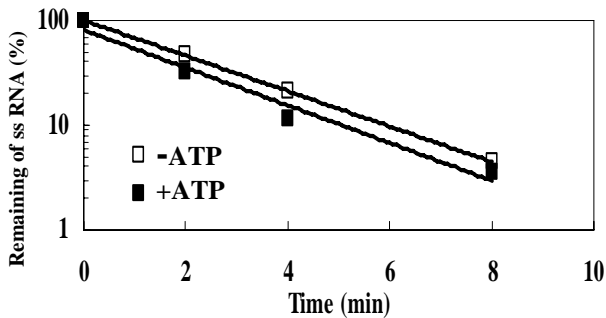

Supplement: pnas_0500994102_2.pdf [file pnas_0500994102_2.pdf]
